# Supplementary material for: Pro197Thr Substitution in Ahas Gene Causing Resistance to Pyroxsulam Herbicide in Rigid Ryegrass (Lolium Rigidum Gaud.)
Source: MDPI journal article supplement (doi:10.3390/su13126648), 2021-06-10
Supplement: s1 [file s1]

## Supplementary material

**Table S1.** Data of RNA extraction of *L. rigidum* sensitive biotype.

| Sample            | Dil to 20 ng/ul in 20ul <b>1ug</b> |             |       |         |           |      |       |
|-------------------|------------------------------------|-------------|-------|---------|-----------|------|-------|
|                   | Dil                                | Qubit ng/ul |       | Average | origin c. | RNA  | H2O   |
| <i>L. rigidum</i> | 20                                 | 18,50       | 18,50 | 18,50   | 370,00    | 1,08 | 18,92 |

| Sample            | KAPA  |          |             | Tapestation |       |          | QPCR     |       | Qubit      | QPCR dil to 8nM |       |
|-------------------|-------|----------|-------------|-------------|-------|----------|----------|-------|------------|-----------------|-------|
|                   | index |          | Qubit ng/ul | TS ng/ul    | Av Mw | conc. nM | conc. nM | ng/ul | nM         | ul templát      | EB    |
| <i>L. rigidum</i> | 21    | GTTTCGGA | 7,64        | 8,82        | 260   | 52,1     | 58,64    | 9,42  | 44,5221445 | 2,73            | 17,27 |

**Figure S1.** Gel picture of RNA sample of *L. rigidum* sensitive biotype.

A2(L): RNA ladder; C2: sample

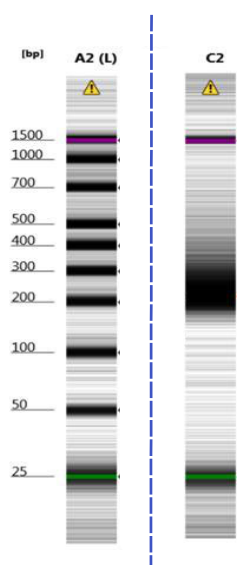

Figure S2. Data of library preparation of *L. rigidum* sensitive biotype.

# C2: Plant pool

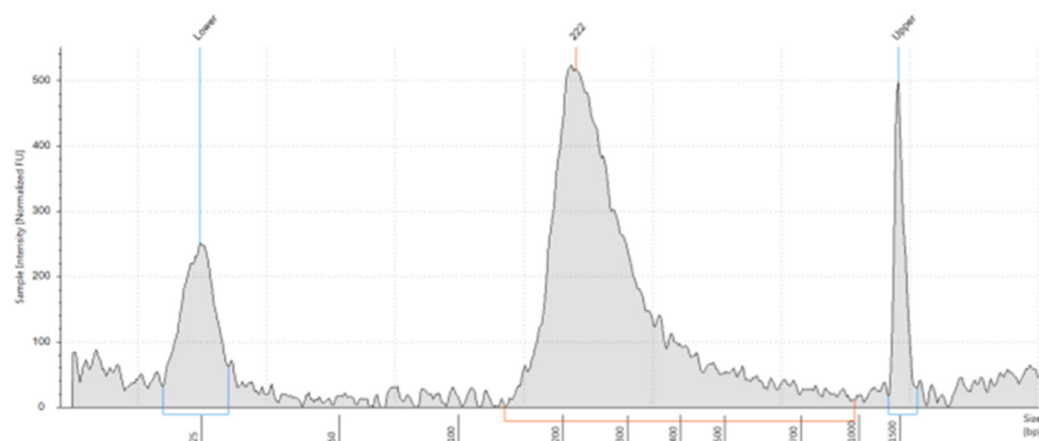

## Sample Table

| Well | Conc. [pg/ul] | Sample Description | Alert | Observations                       |
|------|---------------|--------------------|-------|------------------------------------|
| C2   | 2050          | Plant pool         |       | Caution! Expired ScreenTape device |

## Peak Table

| Size [bp] | Calibrated Conc. [pg/ul] | Assigned Conc. [pg/ul] | Peak Molarity [pmol/l] | % Integrated Area | Peak Comment | Observations |
|-----------|--------------------------|------------------------|------------------------|-------------------|--------------|--------------|
| 25        | 424                      | -                      | 26100                  | -                 |              | Lower Marker |
| 222       | 2050                     | -                      | 14200                  | 100.00            |              |              |
| 1500      | 250                      | 250                    | 256                    | -                 |              | Upper Marker |

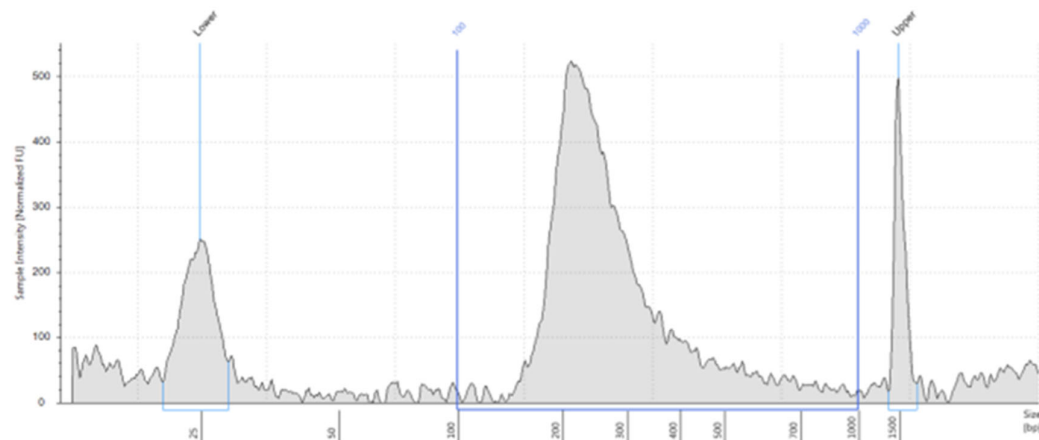

## Region Table

| From [bp] | To [bp] | Average Size [bp] | Conc. [pg/ul] | Region Molarity [pmol/l] | % of Total | Region Comment | Color |
|-----------|---------|-------------------|---------------|--------------------------|------------|----------------|-------|
| 100       | 1000    | 299               | 2070          | 12500                    | 79.36      |                |       |

**Figure S3.** Statistic data and R script of drc analysis.

```
Model fitted: Log-logistic (ED50 as parameter) (4 parms)

Parameter estimates:

              Estimate Std. Error  t-value  p-value
hill:(Intercept)    6.96824    1.79325   3.8858 0.0004822 ***
min_value:(Intercept) 29.12218    1.34760  21.6105 < 2.2e-16 ***
max_value:(Intercept) 99.42234    0.74323 133.7699 < 2.2e-16 ***
ED_50:(Intercept)    3.56898    0.11110  32.1247 < 2.2e-16 ***
---
Signif. codes:  0 '***' 0.001 '**' 0.01 '*' 0.05 '.' 0.1 ' ' 1

Residual standard error:

3.132974 (32 degrees of freedom)
```

```
Model fitted: Log-logistic (ED50 as parameter) (4 parms)

Parameter estimates:

              Estimate Std. Error  t-value  p-value
hill:(Intercept)    3.479764    0.185353  18.774 2.531e-11 ***
min_value:(Intercept) 0.601996    0.674921   0.892  0.3875
max_value:(Intercept) 91.959942    1.279306  71.883 < 2.2e-16 ***
ED_50:(Intercept)    0.793142    0.014352  55.263 < 2.2e-16 ***
---
Signif. codes:  0 '***' 0.001 '**' 0.01 '*' 0.05 '.' 0.1 ' ' 1

Residual standard error:

1.754994 (14 degrees of freedom)
```

```
library(drc)
#data average
library(readr)
average_data <- read_delim("average_data.csv", ";",
  escape_double = FALSE,
  locale = locale(decimal_mark = ",",
    grouping_mark = ""), trim_ws = TRUE)
#Reshaping wide format to long format with gather() function
library(tidyrr)
long.data.average <- gather(average_data, Reps, Value, Rep1:Rep3)
head(long.data.average)
# Fitting log-logistic model
curved_fit <- drm(
  formula = Value ~ conc,
  data = long.data.average,
  fct = LL.4(names = c("hill", "min_value", "max_value", "ED_50")))
summary(curved_fit)
# plot the data with plot()
plot(curved_fit, broken = TRUE, type = "all",
  xlab = "Lolium", xlim = c(0.25, 8),
  ylab = "Biomass (C%)")
#preparation for ggplot2
## new dose levels as support for the line
newdata <- expand.grid(conc=exp(seq(log(0.25), log(8), length=100)))
pm <- predict(curved_fit, newdata=newdata, interval="confidence")
View(newdata)
View(pm)
# new data with predictions
```

```

newdata$p <- pm[,1]
newdata$pmin <- pm[,2]
newdata$pmax <- pm[,3]
View(newdata)
#plot with ggplot2
library(ggplot2)
# need to shift conc == 0 a bit up, otherwise there are problems with coord_trans
long.data.average$conc0 <- long.data.average$conc
long.data.average$conc0[long.data.average$conc0 == 0] <- 0.25
# plotting the curve
dose_curve <- ggplot(long.data.average, aes(x = conc0, y = Value)) +
  geom_point() +
  geom_ribbon(data=newdata, aes(x=conc, y=p, ymin=pmin, ymax=pmax), alpha=0.2) +
  geom_line(data=newdata, aes(x=conc, y=p)) +
  coord_trans(x="log") +
  xlab("Lolium Dose (x)") + ylab("Biomass (C%)")+
  theme_bw()+
  theme(text = element_text(size=16), #edit the size of the text
        axis.text = element_text(size = 14)) +
  scale_x_discrete(limits = c(0.25, 1, 2, 4, 8)) #change legend for x-axis
show(dose_curve)

```

**Table S2.** Primer sequences that were used for amplification of three part of *ahas* gene in *L. rigidum*. Numbering of location was based on *in silico* identified mRNA sequence of *ahas* gene (MK492446).

| Primer name | Length<br>bp | Ann.<br>°C | Primer loc.<br>bp | Sequence (5'–3')       | Covered amino<br>acid sub. point |
|-------------|--------------|------------|-------------------|------------------------|----------------------------------|
| Lolriahas1F | 418          | 58         | 207-624           | CAAGGGCGCCGACATCCT     | 122, 197, 205                    |
| Lolriahas1R |              |            |                   | CTTCTTCCTCGCCTCCTCCG   |                                  |
| Lolriahas2F | 259          | 58         | 917-1175          | GTCTTGCGCAACTTCCCCAG   | 376, 377                         |
| Lolriahas2R |              |            |                   | GATGTCAAGCTCGCTTTGCA   |                                  |
| Lolriahas3F | 399          | 56         | 1531-1929         | GGTAGCTTCCTCATGAACATTC | 574, 653, 654                    |
| Lolriahas3R |              |            |                   | GATGGCAGGATTGCGTATTAA  |                                  |

**Figure S4.** The cds of *ahas* gene in *L. rigidum* indicating regions amplified by specific primers. Coloured lines show positions of the three primer pairs. Numbers between round brackets are start and end positions of primers numbered on cds sequence (MK492446). Vertical grey lines show amino acid positions effected to herbicide resistance-conferring amino acid substitutions. The number after the amino acid refers to the amino acid position in the *ahas* gene of *Arabidopsis thaliana*.

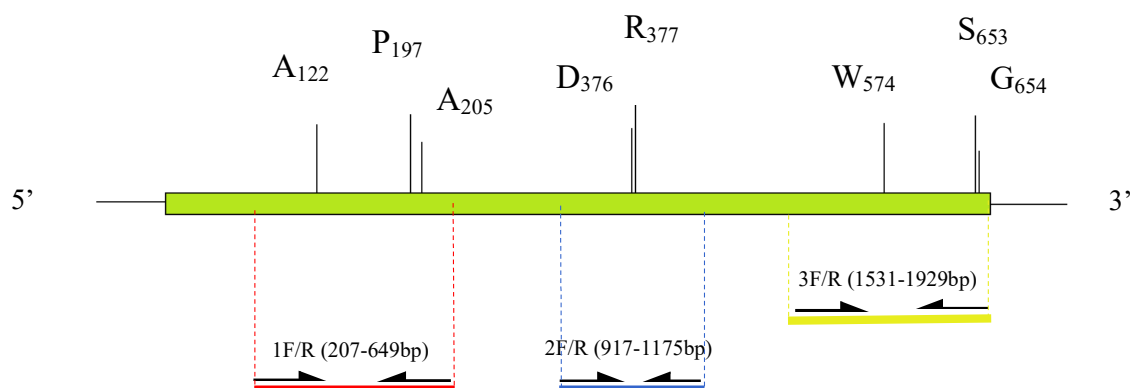

**Figure S5.** PCR products and bioanalyzer analysis of three part of *ahas* gene in *L. rigidum* (Lolriahas1-3).

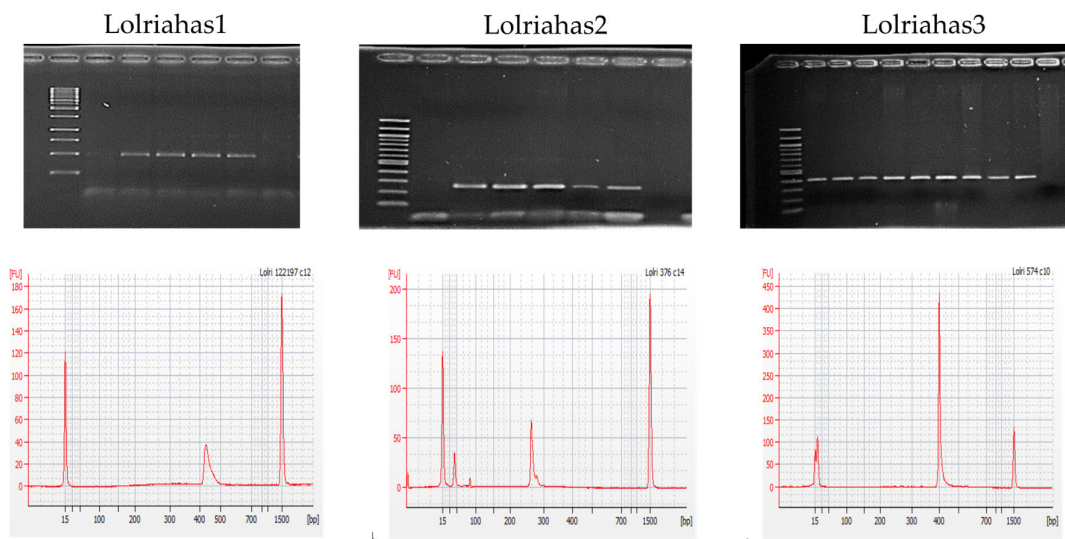

**Figure S6.** Amino acid substitution at Pro197 position in *L. rigidum*. Reference sequence (R) is *A. thaliana* AHAS enzyme. Yellow boxes represent the known mutation points Pro197 and Ala205. Below wild type and resistant AHAS sequences of *L. rigidum* are visualized. Coloured boxes represent the detected mutations at Pro197 position.

|                                      |                                                                 |
|--------------------------------------|-----------------------------------------------------------------|
| <i>A. thaliana</i> sens. biotype 171 | GATNLVSGLDALLDSVPLVAITGQVPRRMIGTDAFQETPIVEVTRSITKHNYLVMDVED 230 |
| <i>L. rigidum</i> sens. biotype      | GATNLVSALADALLDSIPMVAITGQVPRRMIGTDAFQETPIVEVTRSITKHNYLVLDVED    |
| Mutation Pro197Thr                   | GATNLVSALADALLDSIPMVAITGQVTRRMIGTDAFQETPIVEVTRSITKHNYLVLDVED    |
| Mutation Pro197Ala                   | GATNLVSALADALLDSIPMVAITGQVARRMIGTDAFQETPIVEVTRSITKHNYLVLDVED    |
| Mutation Pro197Ser                   | GATNLVSALADALLDSIPMVAITGQVSRRMIGTDAFQETPIVEVTRSITKHNYLVLDVED    |
| Mutation Pro197Gln                   | GATNLVSALADALLDSIPMVAITGQVQRRMIGTDAFQETPIVEVTRSITKHNYLVLDVED    |

**Figure S7.** Electropherogram of a single nucleotide substitution of *ahas* gene in *L. rigidum*. Nucleotide change of CCG to ACG was detected at the 197 amino acid position that resulted proline/threonine substitution numbered 273-275.

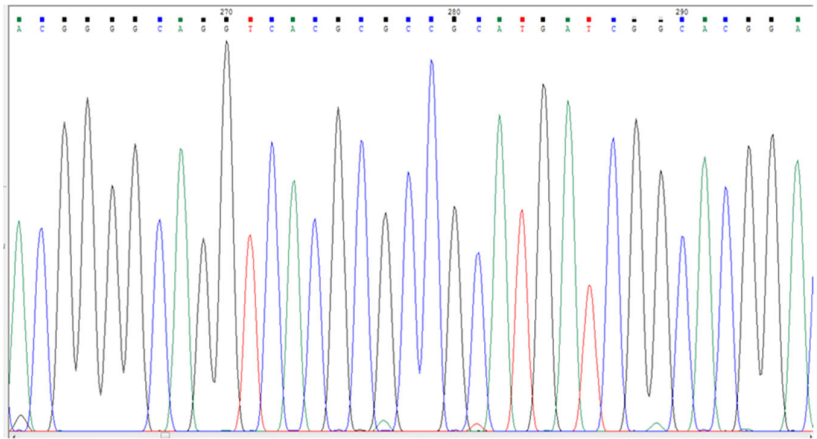

**Figure S8.** Amino acid substitution at Trp574 position in *L. rigidum*. Reference sequence (R) is *A. thaliana* AHAS enzyme. Yellow boxes represent the known mutation point. Wild type and resistant AHAS sequences of *L. rigidum* are visualized. Green box represents the detected Trp574Leu mutation

|                                  |     |                            |     |
|----------------------------------|-----|----------------------------|-----|
| <i>A. thaliana</i> sens. biotype | 566 | QHLGMVMQWEDRFYKANRAHTFLGDP | 591 |
| <i>L. rigidum</i> sens. biotype  |     | QHLGMVVQWEDRFYKANRAHTYLGNP |     |
| Mutation Thr574Leu               |     | QHLGMVVQLEDRFYKANRAHTYLGNP |     |

**Figure S9.** Nucleotide mutation at Asp376Asp GAT/GAC position of AHAS-resistant biotype in *L. rigidum*.

|                                  |      |                                  |      |
|----------------------------------|------|----------------------------------|------|
| <i>A. thaliana</i> sens. biotype | 1098 | GGGTAAGGTTTGATCGTGTACGGGTAA      | 1131 |
| <i>L. rigidum</i> sens. biotype  |      | GGCGTGCGTTTGATCGCGTGACTGGGAA     |      |
| Mutation Asp376                  |      | GGCGTGAGGTTTGATGACCGCGTGACTGGGAA |      |

**Table S3.** Amino acid substitutions of total 50 AHAS-resistant biotype in *L. rigidum*.

| Amino acid substitution in <i>L. rigidum</i> population (total 50 biotype) | Biotypes |
|----------------------------------------------------------------------------|----------|
| Pro197Thr                                                                  | 16       |
| Pro197Ser                                                                  | 14       |
| Pro197Gln                                                                  | 11       |
| Pro197Ala                                                                  | 3        |
| Trp574Leu                                                                  | 6        |
